# Supplementary material
Source: MDPI journal article supplement (https://www.mdpi.com/1996-1073/11/5/1083)
Supplement: s1 [file s1]

## Certificate

**Heliopolis Business Center**

**Certified Translators**

**Certified by the American Embassy and the British Embassy in Cairo**

**Heliopolis Business Center** hereby certifies that its team reviewed the present paper for correcting and editing any linguistic and grammatical mistakes, and that the reviewed version is free from any such mistakes.

**Paper Title:**

**“Smart Hybrid Micro-Grid Integration for Optimal Power Sharing Based Water Cycle Optimization Technique”**

**Prepared by:**

**Peter Makeen , R. A. Swief, T. S. Abdel-Salam and Noha H. El-Amary**

This certificate was issued at the authors' request.

**Date: 16/4/2018**

**CEO**

**Sedika Abu Seada**

*S. Abu Seada*

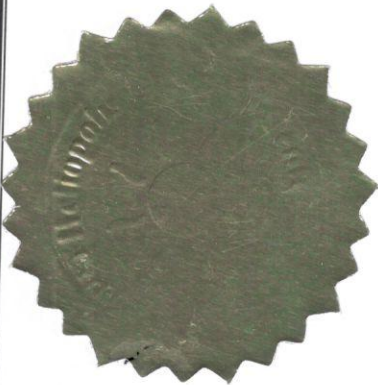

**Heliopolis Business Center  
Certified Translation Office  
88 Merghany St. Suite no. 3  
(202) 29 131 76 / 010 18 999 69**

---

88 Merghany St., Suite no. 3 – Heliopolis – Cairo – Egypt  
Telephone: + (202) 2291-3176, + (202) 2690-5133  
Cellular: + (2) 0100 18 999 69  
Email: [ceo@hbc-Egypt.org](mailto:ceo@hbc-Egypt.org) SedikaS@gmail.com Web site: [www.hbc-Egypt.org](http://www.hbc-Egypt.org)
